# Supplementary material for: Endogenous retroviruses of non-avian/mammalian vertebrates illuminate diversity and deep history of retroviruses
Source: PubMed Central journal article supplement (PMC6001957; doi:10.1371/journal.ppat.1007072), 2018-06-14
Supplement: ppat.1007072.s002.pdf [file ppat.1007072.s002.pdf]

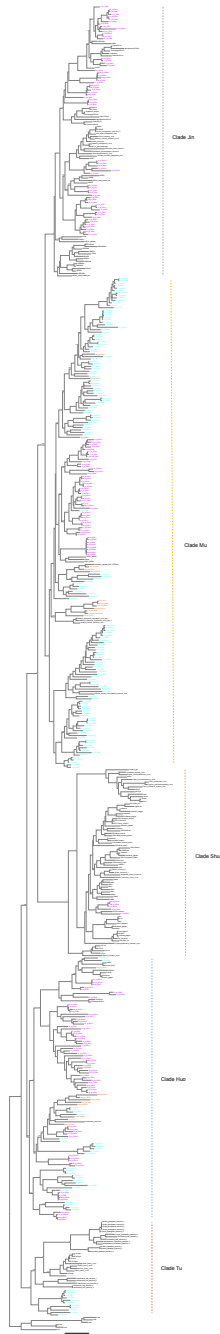

**S2 Fig. The full view of the phylogenetic tree of retroviruses in Figure 1.**
