# Supplementary material for: Endogenous retroviruses of non-avian/mammalian vertebrates illuminate diversity and deep history of retroviruses
Source: PubMed Central journal article supplement (PMC6001957; doi:10.1371/journal.ppat.1007072), 2018-06-14
Supplement: ppat.1007072.s003.pdf [file ppat.1007072.s003.pdf]

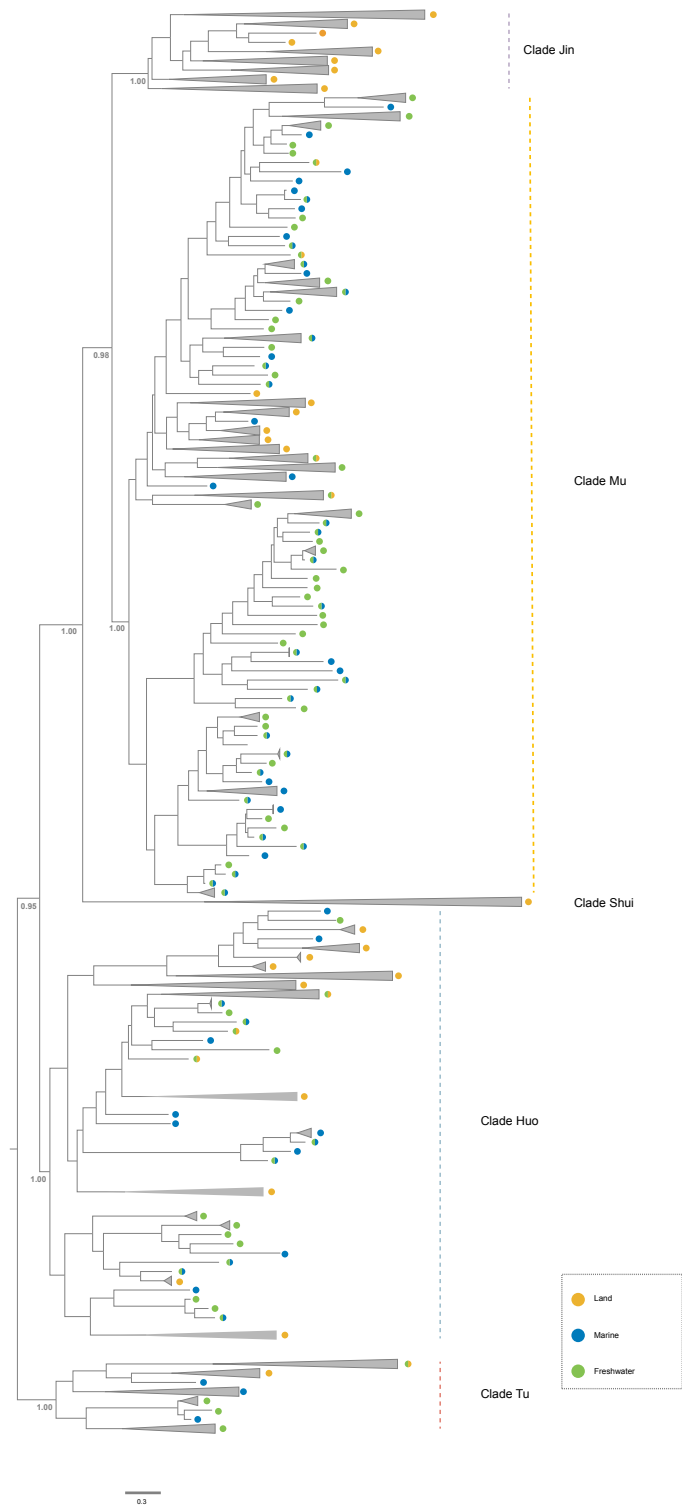

**S3 Fig. Evolution of retroviruses at the land-water interface.** The phylogenetic tree is based on Figure 1. The tip labels are based on the living environments of hosts.
