# Supplementary material for: Endogenous retroviruses of non-avian/mammalian vertebrates illuminate diversity and deep history of retroviruses
Source: PubMed Central journal article supplement (PMC6001957; doi:10.1371/journal.ppat.1007072), 2018-06-14
Supplement: ppat.1007072.s004.pdf [file ppat.1007072.s004.pdf]

**S1 Table. Non-avian/mammalian vertebrate used in this study and ERVs identified**

| Species                              | Abbreviation | Class          | Order              | Size (Mb) | ERV No. | Consensus Sequence No. |
|--------------------------------------|--------------|----------------|--------------------|-----------|---------|------------------------|
| <i>Anguilla anguilla</i>             | An_an        | Actinopterygii | Anguilliformes     | 1018.7    | 42      | 5                      |
| <i>Anguilla japonica</i>             | An_ja        | Actinopterygii | Anguilliformes     | 1151.14   | 55      | 7                      |
| <i>Anguilla rostrata</i>             | An_ro        | Actinopterygii | Anguilliformes     | 1413.05   | 54      | 7                      |
| <i>Oryzias latipes</i>               | Or_la        | Actinopterygii | Beloniformes       | 869.818   | 76      | 3                      |
| <i>Astyanax mexicanus</i>            | As_me        | Actinopterygii | Characiformes      | 1191.24   | 17      | 2                      |
| <i>Clupea harengus</i>               | Cl_ha        | Actinopterygii | Clupeiformes       | 807.712   | 27      | 4                      |
| <i>Cyprinus carpio</i>               | Cy_ca        | Actinopterygii | Cypriniformes      | 1713.64   | 173     | 7                      |
| <i>Danio rerio</i>                   | Da_re        | Actinopterygii | Cypriniformes      | 1371.72   | 157     | 6                      |
| <i>Pimephales promelas</i>           | Pi_pr        | Actinopterygii | Cypriniformes      | 1219.33   | 17      | 2                      |
| <i>Sinocyclocheilus anshuiensis</i>  | Si_an        | Actinopterygii | Cypriniformes      | 1632.72   | 45      | 3                      |
| <i>Sinocyclocheilus grahami</i>      | Si_gr        | Actinopterygii | Cypriniformes      | 1750.29   | 49      | 4                      |
| <i>Sinocyclocheilus rhinocerosus</i> | Si_rh        | Actinopterygii | Cypriniformes      | 1655.79   | 36      | 1                      |
| <i>Squalius pyrenaicus</i>           | Sq_py        | Actinopterygii | Cypriniformes      | 48.1393   | 4       | 0                      |
| <i>Austrofundulus limnaeus</i>       | Au_li        | Actinopterygii | Cyprinodontiformes | 866.963   | 147     | 8                      |
| <i>Cyprinodon nevadensis</i>         | Cy_ne        | Actinopterygii | Cyprinodontiformes | 1011.85   | 18      | 1                      |
| <i>Cyprinodon variegatus</i>         | Cy_va        | Actinopterygii | Cyprinodontiformes | 1035.18   | 61      | 4                      |
| <i>Fundulus heteroclitus</i>         | Fu_he        | Actinopterygii | Cyprinodontiformes | 1021.9    | 84      | 6                      |
| <i>Kryptolebias marmoratus</i>       | Kr_ma        | Actinopterygii | Cyprinodontiformes | 680.349   | 20      | 3                      |
| <i>Nothobranchius furzeri</i>        | No_fu        | Actinopterygii | Cyprinodontiformes | 1242.52   | 86      | 6                      |
| <i>Nothobranchius kuhntae</i>        | No_ku        | Actinopterygii | Cyprinodontiformes | 5.23461   | 10      | 2                      |
| <i>Poecilia formosa</i>              | Po_fo        | Actinopterygii | Cyprinodontiformes | 748.923   | 19      | 1                      |
| <i>Poecilia latipinna</i>            | Po_la        | Actinopterygii | Cyprinodontiformes | 815.145   | 10      | 1                      |
| <i>Poecilia mexicana</i>             | Po_me        | Actinopterygii | Cyprinodontiformes | 801.711   | 9       | 0                      |
| <i>Poecilia reticulata</i>           | Po_re        | Actinopterygii | Cyprinodontiformes | 731.622   | 28      | 2                      |
| <i>Xiphophorus couchianus</i>        | Xi_co        | Actinopterygii | Cyprinodontiformes | 708.396   | 38      | 1                      |
| <i>Xiphophorus hellerii</i>          | Xi_he        | Actinopterygii | Cyprinodontiformes | 733.802   | 68      | 5                      |
| <i>Xiphophorus maculatus</i>         | Xi_ma        | Actinopterygii | Cyprinodontiformes | 729.664   | 47      | 5                      |
| <i>Esox lucius</i>                   | Es_lu        | Actinopterygii | Esociformes        | 904.453   | 284     | 5                      |
| <i>Gadus morhua</i>                  | Ga_mo        | Actinopterygii | Gadiformes         | 824.311   | 31      | 4                      |
| <i>Lepisosteus oculatus</i>          | Le_oc        | Actinopterygii | Lepisosteiformes   | 945.878   | 52      | 3                      |
| <i>Scleropages formosus</i>          | Sc_fo        | Actinopterygii | Osteoglossiformes  | 777.343   | 26      | 2                      |

|                                      |       |                |                   |         |     |    |
|--------------------------------------|-------|----------------|-------------------|---------|-----|----|
| <i>Amphilophus citrinellus</i>       | Am_ci | Actinopterygii | Perciformes       | 844.903 | 119 | 7  |
| <i>Boleophthalmus pectinirostris</i> | Bo_pe | Actinopterygii | Perciformes       | 955.735 | 11  | 0  |
| <i>Dicentrarchus labrax</i>          | Di_la | Actinopterygii | Perciformes       | 675.917 | 41  | 3  |
| <i>Haplochromis burtoni</i>          | Ha_bu | Actinopterygii | Perciformes       | 831.412 | 56  | 5  |
| <i>Labeotropheus fuelleborni</i>     | La_fu | Actinopterygii | Perciformes       | 70.8584 | 16  | 2  |
| <i>Labrus bergylta</i>               | La_be | Actinopterygii | Perciformes       | 805.481 | 94  | 6  |
| <i>Larimichthys crocea</i>           | La_cr | Actinopterygii | Perciformes       | 648.407 | 34  | 0  |
| <i>Lates calcarifer</i>              | La_ca | Actinopterygii | Perciformes       | 668.465 | 47  | 2  |
| <i>Maylandia zebra</i>               | Ma_ze | Actinopterygii | Perciformes       | 859.842 | 101 | 8  |
| <i>Mchenga conophoros</i>            | Mc_co | Actinopterygii | Perciformes       | 73.4256 | 8   | 0  |
| <i>Melanochromis auratus</i>         | Me_au | Actinopterygii | Perciformes       | 68.2386 | 16  | 0  |
| <i>Neolamprologus brichardi</i>      | Ne_br | Actinopterygii | Perciformes       | 847.91  | 43  | 1  |
| <i>Notothenia coriiceps</i>          | No_co | Actinopterygii | Perciformes       | 636.614 | 2   | 1  |
| <i>Oreochromis niloticus</i>         | Or_ni | Actinopterygii | Perciformes       | 927.696 | 147 | 14 |
| <i>Pampus argenteus</i>              | Pa_ar | Actinopterygii | Perciformes       | 350.449 | 17  | 0  |
| <i>Periophthalmodon schlosseri</i>   | Pe_sc | Actinopterygii | Perciformes       | 679.761 | 49  | 6  |
| <i>Periophthalmus magnuspinnatus</i> | Pe_ma | Actinopterygii | Perciformes       | 701.697 | 22  | 1  |
| <i>Pundamilia nyererei</i>           | Pu_ny | Actinopterygii | Perciformes       | 830.133 | 42  | 3  |
| <i>Rhamphochromis esox</i>           | Rh_es | Actinopterygii | Perciformes       | 71.2951 | 6   | 0  |
| <i>Scartelaos histophorus</i>        | Sc_hi | Actinopterygii | Perciformes       | 695.009 | 27  | 1  |
| <i>Stegastes partitus</i>            | St_pa | Actinopterygii | Perciformes       | 800.492 | 29  | 2  |
| <i>Thunnus orientalis</i>            | Th_or | Actinopterygii | Perciformes       | 684.497 | 48  | 4  |
| <i>Miichthys miiuy</i>               | Mi_mi | Actinopterygii | Perciformes       | 619.301 | 35  | 4  |
| <i>Morone saxatilis</i>              | Mo_sa | Actinopterygii | Perciformes       | 585.167 | 8   | 0  |
| <i>Gasterosteus aculeatus</i>        | Ga_ac | Actinopterygii | Gasterosteiformes | 446.611 | 125 | 6  |
| <i>Anoplopoma fimbria</i>            | An_fi | Actinopterygii | Scorpaeniformes   | 699.326 | 26  | 2  |
| <i>Cottus rhenanus</i>               | Co_rh | Actinopterygii | Scorpaeniformes   | 563.609 | 5   | 0  |
| <i>Sebastes nigrocinctus</i>         | Se_ni | Actinopterygii | Scorpaeniformes   | 687.55  | 13  | 1  |
| <i>Sebastes rubrivinctus</i>         | Se_ru | Actinopterygii | Scorpaeniformes   | 756.297 | 18  | 1  |
| <i>Pseudopleuronectes yokohamae</i>  | Ps_yo | Actinopterygii | Pleuronectiformes | 547.831 | 18  | 1  |
| <i>Cynoglossus semilaevis</i>        | Cy_se | Actinopterygii | Pleuronectiformes | 470.199 | 28  | 2  |
| <i>Salmo salar</i>                   | Sa_sa | Actinopterygii | Salmoniformes     | 2966.89 | 79  | 2  |
| <i>Takifugu flavidus</i>             | Ta_fl | Actinopterygii | Tetraodontiformes | 378.032 | 82  | 4  |
| <i>Takifugu rubripes</i>             | Ta_ru | Actinopterygii | Tetraodontiformes | 391.485 | 21  | 4  |
| <i>Tetraodon nigroviridis</i>        | Te_ni | Actinopterygii | Tetraodontiformes | 342.403 | 48  | 3  |
| <i>Callorhynchus milii</i>           | Ca_mi | Chondrichthyes | Chimaeriformes    | 974.499 | 176 | 6  |

|                                     |         |                |                    |         |     |    |
|-------------------------------------|---------|----------------|--------------------|---------|-----|----|
| <i>Leucoraja erinacea</i>           | Le_er   | Chondrichthyes | Batoidea           | 1555.46 | 161 | 5  |
| <i>Rhincodon typus</i>              | Rh_ty   | Chondrichthyes | Orectolobiformes   | 2567.63 | 349 | 4  |
| <i>Latimeria chalumnae</i>          | La_ch   | Sarcopterygii  | Coelacanthiformes  | 2860.59 | 177 | 5  |
| <i>Petromyzon marinus</i>           | Pet_mar | Petromyzontida | Petromyzontiformes | 885.535 | 14  | 1  |
| <i>Branchiostoma floridae</i>       | Br_fl   | Leptocardii    | Amphioxiformes     | N/A     | 0   | 0  |
| <i>Lethenteron camtschaticum</i>    | Le_ca   | Petromyzontida | Petromyzontiformes | 1030.66 | 0   | 0  |
| <i>Xenopus tropicalis</i>           | Xen_tro | Amphibia       | Anura              | 1440.4  | 43  | 4  |
| <i>Xenopus laevis</i>               | Xen_lae | Amphibia       | Anura              | 2718.43 | 78  | 7  |
| <i>Ambystoma mexicanum</i>          | Am_me   | Amphibia       | Urodela            | 353.835 | 1   | 0  |
| <i>Nanorana parkeri</i>             | Nan_par | Amphibia       | Anura              | 2053.87 | 182 | 10 |
| <i>Crocodylus porosus</i>           | Cr_po   | Reptilia       | Crocodylia         | 2049.54 | 399 | 18 |
| <i>Apalone spinifera</i>            | Ap_sp   | Reptilia       | Testudines         | 1931.08 | 215 | 19 |
| <i>Chelonia mydas</i>               | Ch_my   | Reptilia       | Testudines         | 2208.41 | 320 | 19 |
| <i>Chrysemys picta bellii</i>       | Ch_pi   | Reptilia       | Testudines         | 2365.77 | 409 | 25 |
| <i>Malaclemys terrapin</i>          | Ma_te   | Reptilia       | Testudines         | 2439.75 | 704 | 29 |
| <i>Pelodiscus sinensis</i>          | Pe_si   | Reptilia       | Testudines         | 2202.48 | 198 | 16 |
| <i>Protobothrops mucrosquamatus</i> | Pr_mu   | Reptilia       | Squamata           | 1673.88 | 337 | 11 |
| <i>Python bivittatus</i>            | Py_bi   | Reptilia       | Squamata           | 1435.05 | 65  | 6  |
| <i>Thamnophis sirtalis</i>          | Th_si   | Reptilia       | Squamata           | 1424.9  | 66  | 6  |
| <i>Vipera berus</i>                 | Vi_be   | Reptilia       | Squamata           | 1532.39 | 56  | 6  |
| <i>Anolis carolinensis</i>          | An_ca   | Reptilia       | Squamata           | 1799.14 | 241 | 5  |
| <i>Pantherophis guttatus</i>        | Pa_gu   | Reptilia       | Squamata           | 1404.22 | 82  | 6  |
| <i>Ophiophagus hannah</i>           | Op_ha   | Reptilia       | Squamata           | 1594.07 | 49  | 6  |
| <i>Crotalus mitchellii</i>          | Cr_mi   | Reptilia       | Squamata           | N/A     | 82  | 11 |
| <i>Crotalus horridus</i>            | Cr_ho   | Reptilia       | Squamata           | 1520.33 | 257 | 14 |
| <i>Gekko japonicus</i>              | Ge_ja   | Reptilia       | Squamata           | 2490.27 | 143 | 7  |
