# Supplementary material for: Endogenous retroviruses of non-avian/mammalian vertebrates illuminate diversity and deep history of retroviruses
Source: PubMed Central journal article supplement (PMC6001957; doi:10.1371/journal.ppat.1007072), 2018-06-14
Supplement: ppat.1007072.s005.pdf [file ppat.1007072.s005.pdf]

**S2 Table. The representative retroviruses used for phylogenetic analysis**

| <b>Virus Name</b>                                     | <b>Accession No./Ref.</b> |
|-------------------------------------------------------|---------------------------|
| Bovine foamy virus (BFV)                              | NC_001831.1               |
| Equine foamy virus (EFV)                              | NC_002201.1               |
| Feline foamy virus (FFV)                              | NC_001871.1               |
| Spider monkey foamy virus (SFVspm)                    | EU010385.1                |
| Simian foamy virus-gorilla (SFVgor)                   | HM245790.1                |
| simian foamy viruses of chimpanzees (SFVcpz)          | NC_001364.1               |
| Macaque simian foamy virus (SFVmac)                   | NC_010819.1               |
| African green monkey simian foamy virus (SFVagm)      | NC_010820.1               |
| Bovine leukemia virus (BLV)                           | NP_056895.1               |
| Human T-cell leukemia virus type 1 (HTLV-1)           | NP_057860.1               |
| Human T-cell leukemia virus type 2 (HTLV-2)           | NP_041003.2               |
| Human T-cell leukemia virus type 3 (HTLV-3)           | DQ093792.1                |
| Human T-cell leukemia virus type 4 (HTLV-4)           | EF488483.1                |
| Bovine immunodeficiency virus (BIV)                   | NP_040563.1               |
| Human immunodeficiency virus type 2 (HIV-2)           | NP_663784.1               |
| Human immunodeficiency virus type 1 (HIV-1)           | ABK51636.1                |
| Simian immunodeficiency virus of colobus (SIVcol)     | AAK01033.1                |
| Simian immunodeficiency virus of chimpanzee (SIVcpz)  | ABU53017.1                |
| Jembrana disease virus (JDV)                          | AAA64389.1                |
| Caprine arthritis-encephalitis virus (CAEV)           | NP_040939.1               |
| Ovine maedivisna virus (OMV)                          | YP_536867.1               |
| Equine infectious anemia virus (EIAV)                 | NP_056902.1               |
| Feline immunodeficiency virus (FIV)                   | NP_040973.1               |
| Lymphoproliferative disease virus (LDV)               | AAA62195.1                |
| Avian leukosis virus (ALV)                            | YP_004222728.1            |
| Avian leukosis virus subgroup J (ALV-J)               | HQ900844.1                |
| Rous sarcoma virus (RSV)                              | NP_056886.1               |
| Murine endogenous retrovirus ERV-L (MERVL)            | CAA73251.1                |
| Python molurus endogenous retrovirus (Python-molurus) | AAN77283.1                |
| Mouse mammary tumor virus (MMTV)                      | NP_056880.1               |
| Jaagsiekte sheep retrovirus (JSRV)                    | NP_041186.1               |

|                                                             |             |
|-------------------------------------------------------------|-------------|
| Simian retrovirus 2 (SRV2)                                  | AAA47562.1  |
| Simian retrovirus 1 (SRV1)                                  | AAA47732.1  |
| Intracisternal A-type particle (IAPE)                       | Ref. 1      |
| Snakehead retrovirus (SnRV)                                 | NP_043924.1 |
| Walleye dermal sarcoma virus (WDSV)                         | NP_045937.1 |
| Walleye epidermal hyperplasia virus type 1 (WEHV-1)         | AF133051.1  |
| Walleye epidermal hyperplasia virus type 2 (WEHV-2)         | AF133052.1  |
| Atlantic salmon swim bladder sarcoma virus (ASSBSV)         | NC_007654.1 |
| Feline leukemia virus (FLV)                                 | NP_955577.1 |
| Moloney murine leukemia virus (MMLV)                        | NP_057933.2 |
| Baboon endogenous virus (BERV)                              | BAA89659.1  |
| Koala retrovirus (KoRV)                                     | AF151794    |
| RD114 retrovirus (RD114)                                    | NC_009889.1 |
| Reticuloendotheliosis virus (REV)                           | FJ439119.1  |
| Rhinolophus ferrumequinum retrovirus (RfRV)                 | JQ303225.1  |
| Gibbon ape leukemia virus                                   | NP_056790.1 |
| Sus scrofa endogenous virus (PERV-A)                        | EU789636.1  |
| Porcine endogenous retrovirus C (PERV-C)                    | CAC39617.1  |
| Xenopus tropicalis ERV (XTERV2)                             | HM765512    |
| Rabbit endogenous lentivirus type K (RELIK)                 | Ref. 2      |
| Gray mouse lemur prosimian immunodeficiency virus (pSIVgml) | Ref. 3      |
| Sloth endogenous foamy virus                                | Ref. 4      |
| Mustelidae endogenous lentivirus (MELV)                     | Ref. 5      |
| Galeopterus variegatus endogenous lentivirus (GvaELV)       | Ref. 6      |
| Anas-ERV-R                                                  | Ref. 7      |
| Columba-ERV-R                                               | Ref. 7      |
| Columba-ERV-H                                               | Ref. 7      |
| Falco-ERV-H                                                 | Ref. 7      |
| Gallus-ERV-R                                                | Ref. 7      |
| Melopsittacus-ERV-H                                         | Ref. 7      |
| Melopsittacus-ERV-R                                         | Ref. 7      |
| ChiRV1                                                      | Ref. 7      |
| RV-Rook                                                     | Ref. 7      |
| Taeniopygia-ERV-H                                           | Ref. 7      |

|                                  |                |
|----------------------------------|----------------|
| Taeniopygia-ERV-R                | Ref. 7         |
| Corvus-R                         | AJ236130.1     |
| ERV-Asian_house_mouse-I          | Ref. 1         |
| ERV-Black_duck-I                 | AY820068.1     |
| ERV-Black_duck-III               | AY820070.1     |
| ERV-Blue_tit-I                   | AY820077.1     |
| ERV-Blue_tit-II                  | AY820078.1     |
| ERV-Darwins_rhea-I               | Ref. 1         |
| ERV-Eastern_screech_owl-III      | Ref. 1         |
| ERV-Ferruginous_hawk-I           | Ref. 1         |
| ERV-Loon-I                       | AY820074.1     |
| ERV-Ostrich-I                    | AY820094.1     |
| ERV-Peacock-I                    | Ref. 1         |
| ERV-Peregrine_falcon_I           | Ref. 1         |
| ERV-Tinamou-II                   | Ref. 1         |
| ERV-Toucanet-I                   | Ref. 1         |
| ERV-Tragopan-I                   | Ref. 1         |
| ERV-Turkey_vulture-I             | AY820062.1     |
| GfERV1                           | Ref. 1         |
| GGERV10                          | Ref. 1         |
| GGERV29                          | Ref. 1         |
| GGERVLA                          | Ref. 1         |
| Taeniopygia-F                    | Ref. 1         |
| TgERV-2a                         | Ref. 1         |
| Zonotrichia-ERV-A                | Ref. 1         |
| Callorhinchus_milii-Retrovirus-1 | AAVX02021479.1 |
| Callorhinchus_milii-Retrovirus-2 | AAVX02030290.1 |
| Callorhinchus_milii-Retrovirus-3 | AAVX02008076.1 |
| Callorhinchus_milii-Retrovirus-4 | AAVX02007855.1 |
| Callorhinchus_milii-Retrovirus-5 | XM007890932.1  |
| Cynops_pyrrhogaster-Retrovirus-1 | FS304312.1     |
| Cynops_pyrrhogaster-Retrovirus-2 | FS304159.1     |
| Cynops_pyrrhogaster-Retrovirus-3 | FS304248.1     |

|                                        |            |
|----------------------------------------|------------|
| Cynops_pyrhogaster-Retrovirus-4        | FS304221.1 |
| Cynops_pyrhogaster-Retrovirus-5        | FS296312.1 |
| Cynops_pyrhogaster-Retrovirus-6        | FS302975.1 |
| Pleurodeles_waltl-Retrovirus-1         | JG015238   |
| Pleurodeles_waltl-Retrovirus-2         | JG014957   |
| Notophthalmus_viridescens-Retrovirus-1 | JF490018.1 |
| Notophthalmus_viridescens-Retrovirus-2 | JF490018.1 |
| Hynobius_retardatus-Retrovirus-1       | LE148026.1 |
| Hynobius_retardatus-Retrovirus-2       | LE148029.1 |
| Hynobius_retardatus-Retrovirus-3       | LE148029.1 |
| Alphabeta_galgal3                      | Ref. 8     |
| Alphabeta                              | Ref. 8     |
| Avibeta1a                              | Ref. 8     |
| Avibeta1a_taegut1                      | Ref. 8     |
| Avibeta1b                              | Ref. 8     |
| Avibeta1b_taegut1                      | Ref. 8     |
| Avibeta1c_galgal3                      | Ref. 8     |
| Avibeta1c                              | Ref. 8     |
| Avibeta1d                              | Ref. 8     |
| Avibeta1d_taegut1                      | Ref. 8     |
| Avibeta1e_galgal3                      | Ref. 8     |
| Avibeta1e                              | Ref. 8     |
| Avibeta2                               | Ref. 8     |
| Avibeta2_taegut1                       | Ref. 8     |
| Avierviii_galgal3                      | Ref. 8     |
| AviervIII                              | Ref. 8     |
| Avigamma1                              | Ref. 8     |
| Avigamma1_taegut1                      | Ref. 8     |
| HERV1                                  | Ref. 9     |
| HERV1_artiodact                        | Ref. 9     |
| HERV3                                  | Ref. 9     |
| HERV4_10250_100014_con                 | Ref. 9     |

|                        |         |
|------------------------|---------|
| HERV4_10760_100005_con | Ref. 9  |
| HERV9                  | Ref. 9  |
| HERVADP                | Ref. 9  |
| HERVE                  | Ref. 9  |
| HERVFa                 | Ref. 9  |
| HERVfb                 | Ref. 9  |
| HERVH48                | Ref. 9  |
| HERVL                  | Ref. 9  |
| HERVS                  | Ref. 9  |
| HERVT                  | Ref. 9  |
| HML1                   | Ref. 9  |
| HML2                   | Ref. 9  |
| HML3                   | Ref. 9  |
| HML4                   | Ref. 9  |
| HML5                   | Ref. 9  |
| HML6                   | Ref. 9  |
| HML7                   | Ref. 9  |
| HML8                   | Ref. 9  |
| HML9                   | Ref. 9  |
| HUERSP2                | Ref. 9  |
| HUERSP3                | Ref. 9  |
| LTR46                  | Ref. 9  |
| PABL                   | Ref. 9  |
| Prima4                 | Ref. 9  |
| Prima41                | Ref. 9  |
| HERVFc1                | Ref. 10 |
| HERVFc2                | Ref. 10 |
| HERV_HEPSI3            | Ref. 10 |
| HERV_HEPSI1            | Ref. 10 |
| HERVHRGH2              | Ref. 10 |
| HERVI                  | Ref. 10 |
| HERVW                  | Ref. 10 |

HERVH

Ref. 10

HERVFRD

Ref. 10

---

## References

1. Gifford RJ. (2013). Retrovirus reference sequence library (version 2013-12-26). Link: <http://bioinformatics.cvr.ac.uk/paleovirology/site/html/retroviruses.html>
2. Katzourakis A, Tristem M, Pybus OG, Gifford RJ (2007). Discovery and analysis of the first endogenous lentivirus. *Proc Natl Acad Sci USA* 104:6261-6265.
3. Gifford RJ, Katzourakis A, Tristem M, Pybus OG, Winters M, Shafer RW. (2008). A transitional endogenous lentivirus from the genome of a basal primate and implications for lentivirus evolution. *Proc Natl Acad Sci USA* 105:20362-20367.
4. Katzourakis A, Gifford RJ, Tristem M, Gilbert MT, Pybus OG (2009). Macroevolution of complex retroviruses. *Science* 325:1512.
5. Han GZ, Worobey M. (2012). Endogenous lentiviral elements in the weasel family (Mustelidae). *Mol Biol Evol* 29:2905-2908.
6. Han GZ, Worobey M. (2015). A primitive endogenous lentivirus in a colugo: insights into the early evolution of lentiviruses. *Mol Biol Evol* 32:211-215.
7. Niewiadomska AM, Gifford RJ. (2013). The extraordinary evolutionary history of the reticuloendotheliosis viruses. *PLoS Biol* 11:e1001642.
8. Bolisetty M, Blomberg J, Benachou F, Sperber G, Beemon K. (2012). Unexpected diversity and expression of avian endogenous retroviruses. *MBio* 3:e00344-12.
9. Vargiu L, Rodriguez-Tomé P, Sperber GO, Cadeddu M, Grandi N, Blikstad V, Tramontano E, Blomberg J. (2016). Classification and characterization of human endogenous retroviruses; mosaic forms are common. *Retrovirology* 13:7.
10. Jern P, Sperber GO, Blomberg J. (2005). Use of endogenous retroviral sequences (ERVs) and structural markers for retroviral phylogenetic inference and taxonomy. *Retrovirology* 2:50.
